# 1 R2ucare: An R package to perform goodness-of-fit tests for 2 capture-recapture models

3 **Olivier Gimenez, Jean-Dominique Lebreton, Rémi Choquet, Roger Pradel**

4 *CEFE UMR 5175, CNRS—Université de Montpellier—Université Paul-Valéry Montpellier—EPHE, 1919 Route de*  
5 *Mende, 34293 Montpellier cedex 5, France*

---

## 6 **Summary:**

- 7 1. Assessing the quality of fit of a statistical model to data is a necessary step for conducting  
8 safe inference.
- 9 2. We introduce R2ucare, an R package to perform goodness-of-fit tests for open single- and  
10 multi-state capture-recapture models. R2ucare also has various functions to manipulate  
11 capture-recapture data.
- 12 3. We remind the basics and provide guidelines to navigate towards testing the fit of capture-  
13 recapture models. We demonstrate the functionality of R2ucare through its application to  
14 real data.
- 15 4. The R2ucare package will be of use to ecologists interested in estimating demographic pa-  
16 rameters under imperfect detection of individuals.

17 **Keywords:** Arnason-Schwarz, capture-mark-recapture, Cormack-Jolly-Seber, model validation,  
18 R2ucare

---

## 19 **Introduction**

20 Capture–recapture (CR) models have become a central tool in population ecology for estimating  
21 demographic parameters under imperfect detection of individuals (Lebreton et al. 1992; 2009).  
22 These methods rely on the longitudinal monitoring of individuals that are marked (or identifiable)  
23 and then captured or sighted alive over time.

24 Single-state CR models, and the Cormack-Jolly-Seber model in particular (Lebreton et al. 1992),  
25 have been used to assess the effect of climate change (e.g. Guéry et al. 2017) or study senescence  
26 (e.g. Péron et al. 2016). The extension of single-state models to situations where individuals are de-  
27 tected in several geographical sites or equivalently states (e.g. breeding/non-breeding or sane/ill)  
28 are called multi-state CR models (Lebreton et al. 2009). Multistate CR models, and the Arnason-  
29 Schwarz model in particular (Lebreton et al. 2009), are appealing for addressing various biological

30 questions such as metapopulation dynamics (e.g. Spendelov et al. 2016) or life-history trade-offs  
31 (e.g. Supp et al. 2015).

32 A necessary step for correct inference about demographic parameters is to assess the fit of  
33 single- and multi-state models to CR data, regardless of whether a Bayesian or a frequentist frame-  
34 work is adopted.

35 Two family of methods exist to perform goodness-of-fit (GOF) tests for CR models. First, an  
36 omnibus test of the null hypothesis that a given model fits the data adequately can be conducted  
37 using resampling methods and the deviance as a metric (White 2002). However when the null  
38 hypothesis is rejected, this omnibus approach does not inform about an alternative model that  
39 could be fitted. Second, specialized tests have been built to address biologically meaningful causes  
40 of departure from the null hypothesis. A global test for single- and multi-state CR models is  
41 decomposed into several interpretable components based on contingency tables, for example the  
42 presence of transients (Pradel et al., 1997; Pradel et al. 2003) or that for trap-dependence (Pradel,  
43 1993; Pradel et al. 2003). These GOF tests are implemented in the Windows application U-CARE  
44 (Choquet et al. 2009).

45 Here, we introduce the R (R Development Core Team 2014) package R2ucare to perform GOF  
46 tests for single- and multi-state CR models. R2ucare also includes various functions to help ma-  
47 nipulate CR data. As a package in the CRAN database, R2ucare allows to take full advantage of  
48 R's many features (e.g. simulations, model fitting), while being multi-platform. We go through the  
49 theory first, then illustrate the use of R2ucare with an example on wolf in France for single-state  
50 models and geese in the U.S. for multi-state models.

## 51 **Theory**

52 Once a model has been specified, GOF testing is the procedure that controls model assumptions.  
53 GOF testing and model fitting are two complementary procedures that share and compete for the  
54 information contained in the data. The more liberal is a model, the more information it requires  
55 to be fitted (there are more parameters to estimate) but also the fewer assumptions need to be  
56 verified. For instance, the time-dependent CJS model is merely content with the numbers of indi-  
57 viduals captured at each occasion and the numbers never seen again from those released at each

58 occasion when it comes to estimating its parameters. These summary statistics leave much of the  
59 details of the capture histories available to test its assumptions.

60 There are several ways in which this remaining information may be exploited to test the as-  
61 sumptions. The implementation retained in R2ucare builds on the optimal approach originally de-  
62 vised by Pollock et al. (1985) and later modified by Pradel (1993). It is based on contingency tables  
63 and aims at testing with power for transients and trap-dependence. These aspects are examined  
64 specifically in two independent component tests called respectively Test 3.SR and Test 2.CT.  
65 Truly, the component tests directed at transients and trap-dependence actually address features of  
66 the data that are consequences of respectively the presence of transients and trap-dependence, so  
67 that these features may also be caused by other, completely different phenomena. They do verify  
68 respectively that:

- 69 • Newly encountered individuals have the same chance to be later reobserved as recaptured  
70 (previously encountered) individuals (null hypothesis of Test 3.SR).
- 71 • Missed individuals have the same chance to be recaptured at the next occasion as currently  
72 captured individuals (null hypothesis of Test 2.CT).

73 Although these components are often called ‘test of transience’ and ‘test of trap-dependence’,  
74 when it comes to interpretation, one should keep in mind that transience and trap-dependence  
75 are just two specific reasons why the tests respectively called 3.SR and 2.CT might be significant.

76 Beyond these two oriented components, the remaining information is distributed and struc-  
77 tured into two additional components: Test 3.Sm and Test 2.CL. Those examine long-term fea-  
78 tures of the data:

- 79 • Have newly encountered not immediately recaptured individuals the same timing of reen-  
80 counters as previously captured not immediately recaptured individuals (null hypothesis of  
81 Test 3.Sm)?
- 82 • Have missed not immediately recaptured individuals the same timing of reencounters as  
83 currently captured not immediately recaptured individuals (null hypothesis of Test 2.CL)?

84 Data are generally sparse for these components and scattered over many occasions. Despite

85 the implementation of some automatic pooling (see Choquet et al. 2005 for more details about the  
86 pooling rules), they are rarely significant alone.

87 Although many situations can lead to similar test results, we propose here a decision tree  
88 (Figure 1) that should lead to reasonable, if not perfect, solutions in most cases.

89 The theory for the GOF test of the multistate Arnason-Schwarz model was developed along  
90 similar lines as for the CJS model (Pradel et al. 2003). This test has yet more components and some  
91 components have a more complex structure (hence our non attempt to build a decision tree as for  
92 the CJS model), but for all that concerns us, the reasoning remains very similar. Truth be told, the  
93 test implemented in R2ucare is actually a test of the Jolly-Move model, a slightly more general  
94 model than the Arnason-Schwarz model in that it allows detection parameters to depend on the  
95 previous state occupied. This is a weird idea in most common situations, so that we may reason  
96 as if we were examining the Arnason-Schwarz model. Components here have been designed  
97 to detect transients, trap-dependence, and - this is new - the memory of past states. This last  
98 point means that the component examines whether transitions to a new state depend on previous  
99 states beyond the current one. The corresponding components are respectively Test 3.GSR, Test  
100 M. ITEC, and Test WBWA. Like for the CJS case, they actually examine features of the data, namely  
101 that:

- 102 • Newly encountered individuals have the same chance to be later reobserved as recaptured  
103 (i.e. previously encountered) individuals (null hypothesis of Test 3.GSR which is the exact  
104 equivalent of 3.SR).
- 105 • Missed individuals have the same chance to be recaptured in each state at the next occasion  
106 as currently captured individuals in the same state (null hypothesis of Test M. ITEC).
- 107 • Individuals currently captured in the same state have the same chance to be next reobserved  
108 in the different states independently of their most recent observed state (null hypothesis of  
109 Test WBWA).

110 These interpretable components are complemented by two composite components with no  
111 clearly identified interpretation, Test 3.GSm and Test M.LTEC. We do not attempt to give a de-  
112 scription of these; let it suffice to say that Test 3.GSm is concerned with comparing newly and

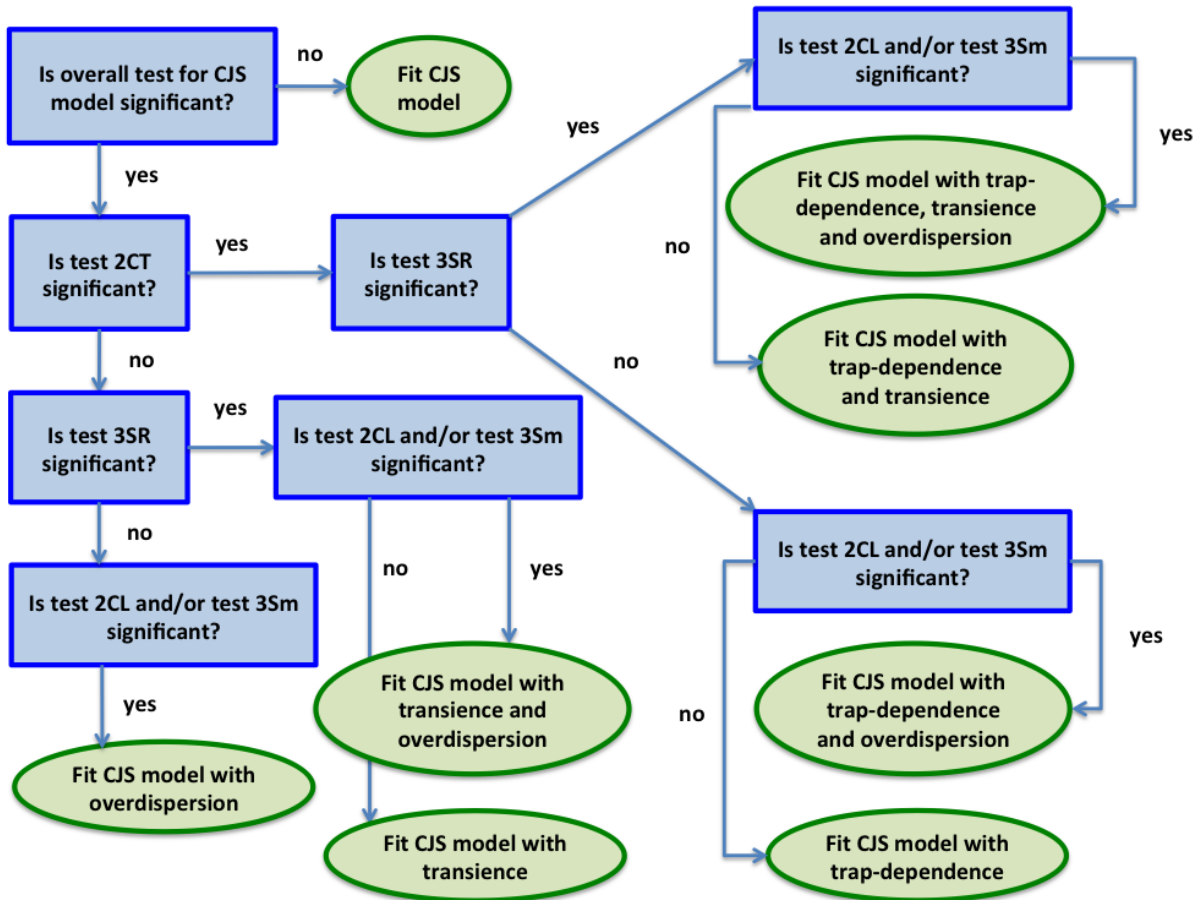

Figure 1: Decision tree to navigate towards testing the fit of single site/state capture-recapture models, with the Cormack-Jolly-Seber (CJS) model as a reference. Questions are in the blue rectangles, actions in the green ellipses. We start by asking the question in the top-left corner. The coefficient of overdispersion is calculated as the ratio of the goodness-of-fit test statistic over the number of degrees of freedom (Pradel et al. 2005). *Remark 1*: we begin by testing for the presence of trap-dependence, then that of transience; these steps could be permuted without affecting the final outcome. *Remark 2*: the overall goodness-of-fit test may be significant while none of the four sub-components is; in this situation, we recommend fitting the CJS model and correcting for overdispersion. *Remark 3*: we do not cover the issue of heterogeneity for which a formal test does not exist. When both the tests for the presence of transience and trap-dependence are significant, and only them, there is suspicion of heterogeneity in detection (Péron et al. 2010). Péron et al. (2010) implemented an approximate procedure to assess the presence of heterogeneity in the detection process, and Jeyam et al. (2017) developed a formal test for the same purpose. Cubaynes et al. (2012) recommended using the Akaike Information Criterion (AIC) to compare models with and without heterogeneity. *Remark 4*: To account for the presence of transience, that of trap-dependence or an effect of heterogeneity, we refer to Pradel et al. (1997), Pradel and Sanz-Aguilar (2012; see also Pradel 1993 and Gimenez et al. 2003) and Gimenez et al. (2017) respectively.

113 previously encountered, while Test M. LTEC contrasts missed and encountered individuals. For-  
114 tunately, these components play a secondary role as they are most time not significant alone.

115 For more details about the theory of GOF testing for CR models, we refer to Pradel et al. (2005)  
116 and Cooch and White (2006).

## 117 **The R2ucare package**

118 The R2ucare package contains R functions to perform GOF tests for CR models as well as various  
119 functions to manipulate CR data (see Table 1 and the vignette of the package named vignette\_R2ucare).  
120 It ensures reproducibility which was not allowed with the U-CARE (Choquet et al. 2009) Windows  
121 standalone application. Besides, it can be used in combination with other R packages for fitting  
122 CR data like RMark (Laake 2013) or marked (Laake et al. 2013) or to carry out simulations to assess  
123 statistical power (e.g. Bromaghin et al. 2013; Fletcher et al. 2012).

Table 1: The main functions of R2ucare and their description

| Function                  | Description                                                                                                                                                                                                                         |
|---------------------------|-------------------------------------------------------------------------------------------------------------------------------------------------------------------------------------------------------------------------------------|
| <code>marray</code>       | builds a m-array for single-site/state capture-recapture data                                                                                                                                                                       |
| <code>multimarray</code>  | builds a m-array for multi-site/state capture-recapture data                                                                                                                                                                        |
| <code>group_data</code>   | pool together individuals with the same encounter capture-recapture history                                                                                                                                                         |
| <code>ungroup_data</code> | split encounter capture-recapture histories in individual ones                                                                                                                                                                      |
| <code>read_inp</code>     | read MARK formatted files                                                                                                                                                                                                           |
| <code>read_headed</code>  | read E-SURGE formatted files                                                                                                                                                                                                        |
| <code>test3sr</code>      | in single-site/state models, test for the presence of transients, the null hypothesis being that there is no difference in the probability of being later reencountered between new and old individuals encountered at occasion $i$ |
| <code>test3sm</code>      | in single-site/state models, test the null hypothesis that there is no difference in the expected time of first reencounter between the new and old individuals encountered at occasion $i$ and seen again at least once            |

---

| Function   | Description                                                                                                                                                                                                                                                                                                                                              |
|------------|----------------------------------------------------------------------------------------------------------------------------------------------------------------------------------------------------------------------------------------------------------------------------------------------------------------------------------------------------------|
| test2ct    | in single-site/state models, test for the presence of trap-dependence, the null hypothesis being that there is no difference in the probability of being reencountered at occasion $i + 1$ between those encountered and not encountered at occasion $i$ conditional on presence at both occasions                                                       |
| test2c1    | in single-site/state models, test the null hypothesis that there is no difference in the expected time of next reencounter between the individuals encountered and not encountered at occasion $i$ conditional on presence at both occasions $i$ and $i + 2$                                                                                             |
| test3Gsr   | in multi-site/state models, test the null hypothesis that there is no difference in the probability of being later reencountered between new and old individuals encountered at occasion $i$ in state $l$                                                                                                                                                |
| test3Gwbwa | in multi-site/state models, test for the presence of memory, the null hypothesis being that there is no difference in the expected state of next reencounter among the individuals previously encountered in the different states                                                                                                                        |
| testMitec  | in multi-site/state models, test the null hypothesis that there is no difference in the probabilities of being reencountered in the different states at $i + 1$ between the animals in the same state at occasion $i$ whether encountered or not encountered at this date, conditional on presence at both occasions                                     |
| testMltec  | in multi-site/state models, test the null hypothesis that there is no difference in the expected time and state of next reencounter between individuals in the same state at occasion $i$ that were not encountered at occasion $i + 1$ whether encountered or not encountered at occasion $i$ conditional on presence at both occasions $i$ and $i + 2$ |
| test3Gsm   | in multi-site/state models, this component is a composite test (several null hypotheses) that gathers what remains of the global test after the other components have been isolated (Pradel et al. 2005)                                                                                                                                                 |

---

## 124 Goodness-of-fit tests for single-site/state models

125 We illustrate the use of R2ucare to assess the GOF of the CJS model to a dataset on wolves (*Canis*  
126 *lupus*) in France (e.g., Fletcher et al. 2012). Briefly, the data consist of capture histories for 160  
127 individuals, partitioned into 35 3-month intervals (from spring 1995 to autumn 2003).

128 We first load the R2ucare package:

```
library(R2ucare)
```

129 Then we read in the wolf data that is provided with the package. To do so, R2ucare contains  
130 two functions that accomodate the most frequent CR formats: `read_inp` deals with the MARK format  
131 (Cooch and White 2006) while `read_headed` deals with the E-SURGE format (Choquet et al. 2009).  
132 The wolf dataset has the MARK format, therefore:

```
wolf = system.file("extdata", "wolf_inp", package = "R2ucare")  
wolf = read_inp(wolf)
```

133 We then get the matrix and number of CR encounter histories:

```
ch = wolf$encounter_histories  
n = wolf$sample_size
```

134 Following the procedure described in Figure 1, we first assess the overall fit of the CJS model  
135 by using the function `overall_CJS`:

```
overall_CJS(ch,n)
```

```
136 ##                chi2 degree_of_freedom p_value  
137 ## Gof test for CJS model: 180.73                115                0
```

138 Clearly, the CJS model does not fit the data well ( $\chi_{115}^2 = 180.73$ ,  $P < 0.01$ ). We then test for an  
139 effect of trap-dependence:



```
test2ct(ch,n,verbose = FALSE)
```

```
140 ## $test2ct
141 ##      stat      df    p_val sign_test
142 ##    64.451   31.000   0.000   -5.641
```

143 Test 2.CT is significant ( $\chi_{31}^2 = 64.45$ ,  $P < 0.01$ ). We also provide the signed square root  
144 (sign\_test) of the Pearson chi-square statistic as a directional test of the null hypothesis (Pradel  
145 et al. 2005), which is negative when there is an excess of individuals encountered at a given  
146 occasion among the individuals encountered at the previous occasion.

147 Note that, by default, the GOF functions in R2ucare returns all the contingency tables that  
148 compose the test under scrutiny, which might not be of immediate use and rather cumbersome  
149 on screen, hence the use of verbose=FALSE in the call to the test2ct function above. Now we ask  
150 whether there is a transient effect:

```
test3sr(ch,n,verbose = FALSE)
```

```
151 ## $test3sr
152 ##      stat      df    p_val sign_test
153 ##    65.414   29.000   0.000    5.037
```

154 Test 3.SR is also significant ( $\chi_{29}^2 = 65.41$ ,  $P < 0.01$ ). We also provide the signed square root  
155 (sign\_test) of the Pearson chi-square statistic (Pradel et al. 2005), which is positive when there is  
156 an excess of never seen again among the newly marked.

157 Navigating through the decision tree in Figure 1 suggests we should perform the two remain-  
158 ing tests:

```
test3sm(ch,n,verbose = FALSE)
```

```
159 ## $test3sm
160 ##      stat      df    p_val
161 ##    22.977   25.000   0.579
```

```
test2cl(ch,n,verbose = FALSE)
```

```
162 ## $test2cl
163 ##   stat      df  p_val
164 ## 27.888 30.000 0.576
```

165 Neither Test 3.Sr ( $\chi_{25}^2 = 22.98, P = 0.58$ ) nor Test 2.CL ( $\chi_{30}^2 = 27.89, P = 0.58$ ) is significant,  
166 therefore we recommend fitting a CJS model incorporating both a transience effect and a trap-  
167 dependence effect and start the analysis from there. In passing, it is possible to calculate a GOF  
168 test for this new model by removing the two components Test 3.SR and Test 2.CT to the overall  
169 GOF test (Pradel et al. 2005):

```
# subtract the components 3SR and 2CT to the CJS test statistic
stat_new = overall_CJS(ch,n)$chi2 - (test3sr(ch, n)$test3sr[[1]]
                                     + test2ct(ch, n)$test2ct[[1]])
# calculate degree of freedom associated with the new test statistic
df_new = overall_CJS(ch,n)$degree_of_freedom -
         (test3sr(ch, n)$test3sr[[2]] + test2ct(ch, n)$test2ct[[2]])
# compute p-value
1 - pchisq(stat_new, df_new)
```

```
170 ## [1] 0.6332861
```

171 This new model incorporating transient and trap-dependence effects fits the wolf data well  
172 ( $\chi_{55}^2 = 50.87, P = 0.63$ ).

173 To date, no GOF test exists for models with individual covariates (unless we discretize them  
174 and use groups), individual time-varying covariates (unless we treat them as states) or temporal  
175 covariates; therefore, these covariates should be removed from the dataset before using R2ucare.  
176 For groups, we recommend treating the groups separately (see e.g. the example in the help file for  
177 overall\_CJS).

## 178 Goodness-of-fit tests for the Arnason-Schwarz model

179 We now wish to assess the GOF of the Arnason-Schwarz model to a dataset on Canada Geese  
180 (*Branta canadensis*) (Pradel et al. 2005). Briefly, the data consist of capture histories for 28,849  
181 individuals marked and re-observed at wintering locations in the US between 1984 and 1986.

182 We first read in the geese data that are provided with the package:

```
geese = system.file("extdata", "geese.inp", package = "R2ucare")
geese = read_inp(geese)
```

183 We then get the matrix and number of CR encounter histories:

```
geese.hist = geese$encounter_histories
geese.freq = geese$sample_size
```

184 Then we assess the quality of fit of the Arnason-Schwarz model to the geese CR data with  
185 the `overall_JMV` function. Beware that it takes a minute or so to run the test because an iterative  
186 optimization procedure is involved to perform Test M. ITEC and Test M. LTEC (Pradel et al. 2003)  
187 that is repeated several times to try and avoid local minima.

```
overall_JMV(geese.hist, geese.freq)
```

```
188 ##                chi2 degree_of_freedom p_value
189 ## Gof test for JMV model: 982.589          197      0
```

190 The null hypothesis that the Arnason-Schwarz provides an adequate fit to the data is clearly  
191 rejected ( $\chi^2_{197} = 982.59$ ,  $P < 0.01$ ). In a second step, we further explore each component of the  
192 overall test:

```
test3Gsr(geese.hist, geese.freq, verbose=FALSE) # transience
```

```
193 ## $test3Gsr
194 ##   stat      df  p_val
195 ## 117.753 12.000 0.000
```

```
test3Gsm(geese.hist,geese.freq,verbose=FALSE)
```

```
196 ## $test3Gsm
197 ##   stat      df  p_val
198 ## 302.769 119.000  0.000
```

```
test3Gwbwa(geese.hist,geese.freq,verbose=FALSE) # memory
```

```
199 ## $test3Gwbwa
200 ##   stat      df  p_val
201 ## 472.855  20.000  0.000
```

```
testMitec(geese.hist,geese.freq,verbose=FALSE) # short-term trap-dependence
```

```
202 ## $testMitec
203 ##   stat      df  p_val
204 ##  68.233  27.000  0.000
```

```
testMltec(geese.hist,geese.freq,verbose=FALSE) # long-term trap-dependence
```

```
205 ## $testMltec
206 ##   stat      df  p_val
207 ##  20.982  19.000  0.338
```

208 It appears that all components are significant but the test for a long-term trap-dependence  
209 effect. By setting the verbose argument to TRUE (by default argument), one could closely examine  
210 the individual contingency tables and better understand the reasons for the departure to the null  
211 hypotheses. For example, let us redo the test for transience Test 3.GSR:

```
test3Gsr(geese.hist,geese.freq,verbose=TRUE)
```

```
212 ## $test3Gsr
213 ##   stat      df  p_val
```

```
214 ## 117.753 12.000 0.000
215 ##
216 ## $details
217 ## occasion site stat df p_val test_perf
218 ## 1 2 1 3.894777e-03 1 9.502378e-01 Chi-square
219 ## 2 2 2 2.715575e-04 1 9.868523e-01 Chi-square
220 ## 3 2 3 8.129814e+00 1 4.354322e-03 Chi-square
221 ## 4 3 1 1.139441e+01 1 7.366526e-04 Chi-square
222 ## 5 3 2 2.707742e+00 1 9.986223e-02 Chi-square
223 ## 6 3 3 3.345916e+01 1 7.277633e-09 Chi-square
224 ## 7 4 1 1.060848e+01 1 1.125702e-03 Chi-square
225 ## 8 4 2 3.533332e-01 1 5.522323e-01 Chi-square
226 ## 9 4 3 1.016778e+01 1 1.429165e-03 Chi-square
227 ## 10 5 1 1.101349e+01 1 9.045141e-04 Chi-square
228 ## 11 5 2 1.292013e-01 1 7.192616e-01 Chi-square
229 ## 12 5 3 2.978513e+01 1 4.826802e-08 Chi-square
```

230 By inspecting the data.frame containing the details of the test, we see that there is no transients  
231 in site 2.

## 232 **Future directions**

233 R2ucare allows evaluating the quality of fit of standard capture-recapture models for open pop-  
234 ulations. Future developments will focus on implementing goodness-of-fit tests for models com-  
235 bining different sources of data (McCrea et al. 2014) and residual-based diagnostics (Choquet et  
236 al. 2013, Warton et al. 2017).

## 237 **Availability**

238 The current stable version of the package requires R 3.3.3 and is distributed under the GPL license.  
239 It can be installed from CRAN and loaded into a R session as follows:

```
install.packages("R2ucare",dependencies=TRUE)
library("R2ucare")
```

240 The repository on GitHub <https://github.com/oliviergimenez/R2ucare> hosts the develop-  
241 ment version of the package, it can be installed as follows:

```
if(!require(devtools)) install.packages("devtools")
library("devtools")
install_github("oliviergimenez/R2ucare")
```

242 We also maintain a forum at [https://groups.google.com/forum/#!forum/esurge\\_ucare](https://groups.google.com/forum/#!forum/esurge_ucare) to which  
243 questions can be asked.

## 244 Acknowledgments

245 Replication files (paper and code) are available on the first author's Github account (<https://github.com/oliviergimenez>).  
246 This work was supported by a grant from the French National Research Agency, reference ANR-16-CE02-  
247 0007. We warmly thank E. Marboutin and J. Hestbeck for sharing the wolf and geese datasets, respectively.

## 248 Authors' contributions

249 OG, JDL and RP conceived the ideas and designed methodology; OG, JDL, RC and RP wrote the code; OG  
250 and RP led the writing of the manuscript. All authors contributed critically to the drafts and gave final  
251 approval for publication.

## 252 References

- 253 Bromaghin, J. F., T. L. McDonald, and S. C. Amstrup (2013) Plausible combinations: An improved method to  
254 evaluate the covariate structure of Cormack-Jolly-Seber mark-recapture models. *Open Journal of Ecology*  
255 **3**: 11-22.
- 256 Choquet, R., Reboulet, A.-M., Lebreton, J.-D., Gimenez, O., and R. Pradel. (2005). U-CARE 2.2 user's  
257 manual. CEFE, UMR 5175, Montpellier.
- 258 Choquet, R., Lebreton, J.-D., Gimenez, O., Reboulet, A.-M., and R. Pradel. (2009). U-CARE: Utilities for  
259 performing goodness of fit tests and manipulating CApture-REcapture data. *Ecography* **32**: 1071-1074.

- 260 Choquet, R., Rouan, L., Pradel, R. (2009). Program E-SURGE: A software application for fitting multievent  
261 models. *Modeling Demographic Processes in Marked Populations*. D. L. Thomson, E. G. Cooch and M.  
262 J. Conroy. Berlin, Germany, Springer. **3**: 845-865.
- 263 Choquet, R., Carrie, C., Chambert, T. & Boulinier, T. (2013). Estimating transitions between states using  
264 measurements with imperfect detection: application to serological data. *Ecology* **94**: 2160-2165.
- 265 Cubaynes, S., C. Lavergne, E. Marboutin, and O. Gimenez (2012). Assessing individual heterogeneity us-  
266 ing model selection criteria: How many mixture components in capture-recapture models? *Methods in*  
267 *Ecology and Evolution* **3**: 564-573.
- 268 Fletcher, D., Lebreton, J.-D., Mareshcot, L., Schaub, M., Gimenez, O., Sooten, E. and S. Dawson (2012). Bias  
269 in estimation of adult survival and asymptotic population growth rate caused by undetected capture  
270 heterogeneity. *Methods in Ecology and Evolution* **3**: 206-216.
- 271 Gimenez O., Choquet R. and J.-D. Lebreton (2003). Parameter redundancy in multistate capture-recapture  
272 models. *Biometrical Journal* **45**: 704-722.
- 273 Gimenez, O., Cam, E., and J.-M. Gaillard (2017). Individual heterogeneity and capture-recapture models:  
274 what, why and how? *Oikos*. In press. doi: 10.1111/oik.04532.
- 275 Guéry, L., Descamps, S., Pradel, R., Hanssen, S. A., Erikstad, K. E., Gabrielsen, G. W., Gilchrist, H. G. and  
276 Bêty, J. (2017). Hidden survival heterogeneity of three Common eider populations in response to climate  
277 fluctuations. *Journal of Animal Ecology* **86**: 683–693.
- 278 Jeyam, A., R. S. McCrea, T. Bregnballe, M. Frederiksen, and R. Pradel (2017). A test of positive association  
279 for detecting heterogeneity in capture for capture-recapture data. Submitted to *Journal of Agricultural,*  
280 *Biological, and Environmental Statistics*.
- 281 Laake, J. L. (2013). RMark: An R Interface for Analysis of Capture-Recapture Data with MARK. AFSC  
282 Processed Rep 2013-01, 25p. Alaska Fish. Sci. Cent., NOAA, Natl. Mar. Fish. Serv., 7600 Sand Point Way  
283 NE, Seattle WA 98115.
- 284 Laake, J. L., Johnson, D. S. and Conn, P. (2013). marked: An R package for maximum-likelihood and MCMC  
285 analysis of capture-recapture data. *Methods in Ecology and Evolution* **4**: 885-890.
- 286 Lebreton, J.-D. et al. (1992). Modeling survival and testing biological hypotheses using marked animals: a  
287 unified approach with case studies. *Ecological Monographs* **62**: 67-118.
- 288 McCrea, R. S., B. J. T. Morgan, R. Pradel (2014). Diagnostic Goodness-of-Fit Tests for Joint Recapture and

- 289 Recovery Models. *Journal of Agricultural, Biological, and Environmental Statistics* **19**: 338-356.
- 290 Péron, G., Crochet, P.A.C., Choquet, R., Pradel, R., Lebreton, J.-D. and O. Gimenez. (2010). Capture-  
291 recapture models with heterogeneity to study survival senescence in the wild. *Oikos* **119**: 524-532.
- 292 Péron, G., J.-M. Gaillard, C. Barbraud, C. Bonenfant, A. Charmantier, R. Choquet, T. Coulson, V. Grosbois,  
293 A. Loison, G. Marzolin, N. Owen-Smith, D. Pardo, F. Plard, R. Pradel, C. Toïgo, O. Gimenez (2016).  
294 Evidence of reduced individual heterogeneity in adult survival of long-lived species. *Evolution* **70**: 2909-  
295 2914.
- 296 Pollock, K., J. Hines, J. Nichols (1985). Goodness-of-Fit Tests for Open Capture-Recapture Models. *Biomet-*  
297 *rics* **41**: 399-410.
- 298 Pradel, R. (1993). Flexibility in Survival analysis from recapture data: Handling trap-dependence. Pages  
299 29–37 in Lebreton & North, editors. *Marked individuals in the study of bird population*. Birkhäuser Verlag,  
300 Basel, Switzerland.
- 301 Pradel, R., Hines, J. E., Lebreton, J.-D. & Nichols, J. D. (1997). Capture-recapture survival models taking  
302 account of transients. *Biometrics* **53**: 60–72.
- 303 Pradel R., Wintrebert C.M.A. and Gimenez O. (2003). A proposal for a goodness-of-fit test to the Arnason-  
304 Schwarz multisite capture-recapture model. *Biometrics* **59**: 43-53.
- 305 Pradel, R., Gimenez O. and J.-D. Lebreton (2005). Principles and interest of GOF tests for multistate capture-  
306 recapture models. *Animal Biodiversity and Conservation* **28**: 189–204.
- 307 Pradel R, Sanz-Aguilar A (2012) Modeling Trap-Awareness and Related Phenomena in Capture-Recapture  
308 Studies. *PLoS ONE* **7**: e32666.
- 309 R Development Core Team (2014) *R: A Language and Environment for Statistical Computing*. R Foundation for  
310 Statistical Computing, Vienna, Austria.
- 311 Spendelow, J. A., D. Monticelli, J. D. Nichols, J. E. Hines, I. C. T. Nisbet, G. Cormons, H. Hays, J. J. Hatch,  
312 and C. S. Mostello (2016). Roseate Tern breeding dispersal and fidelity: responses to two newly restored  
313 colony sites. *Ecosphere* **7**: e01510.
- 314 Supp, S. R., D. N. Koons, and S. K. M. Ernest (2015). Using life history trade-offs to understand core-  
315 transient structuring of a small mammal community. *Ecosphere* **6**: 187.
- 316 Warton, D. I., J. Stoklosa, G. Guillera-Arroita, D. I. MacKenzie and A. H. Welsh (2017). Graphical diagnostics



- 317 for occupancy models with imperfect detection. *Methods in Ecology and Evolution* **8**: 408-419.
- 318 White, G. C. (2002). Discussant: The Use of Auxiliary Variables in Capture-Recapture Modeling: An  
319 Overview. *Journal of Applied Statistics* **29**: 103-106.
